# Supplementary material for: Increased Response to Immune Checkpoint Inhibitors with Dietary Methionine Restriction in a Colorectal Cancer Model
Source: MDPI journal article supplement (doi:10.3390/cancers15184467), 2023-09-07
Supplement: s1 [file s1]

**Table S1.** Nutritional characteristics of the methionine-adequate (TD.140520) and methionine-restricted (TD.190775) diets used in the study.

| <b>Formula</b>               | <b>TD.140520<br/>g/Kg</b> | <b>TD.190775<br/>g/kg</b> |
|------------------------------|---------------------------|---------------------------|
| Sucrose                      | 445.297                   | 449.28                    |
| Corn Starch                  | 198.783                   | 200                       |
| Corn Oil                     | 100                       | 100                       |
| Cellulose                    | 30                        | 30                        |
| Mineral Mix, AIN-76 (170915) | 35                        | 35                        |
| Calcium Phosphate, dibasic   | 3                         | 3                         |
| L-Alanine                    | 3.5                       | 3.5                       |
| L-Arginine HCl               | 12.1                      | 12.1                      |
| L-Asparagine                 | 6                         | 6                         |
| L-Aspartic Acid              | 3.5                       | 3.5                       |
| L-Cystine                    | 3.5                       | 3.5                       |
| L-Glutamic Acid              | 40                        | 40                        |
| Glycine                      | 23.3                      | 23.3                      |
| L-Histidine HCl, monohydrate | 4.5                       | 4.5                       |
| L-Isoleucine                 | 8.2                       | 8.2                       |
| L-Leucine                    | 11.1                      | 11.1                      |
| L-Lysine HCl                 | 18                        | 18                        |
| L-Methionine                 | 6.5                       | 1.2                       |
| L-Phenylalanine              | 7.5                       | 7.5                       |
| L-Proline                    | 3.5                       | 3.5                       |
| L-Serine                     | 3.5                       | 3.5                       |
| L-Threonine                  | 8.2                       | 8.2                       |
| L-Tryptophan                 | 1.8                       | 1.8                       |
| L-Tyrosine                   | 5                         | 5                         |
| L-Valine                     | 8.2                       | 8.2                       |
| Vitamin Mix, Teklad (40060)  | 10                        | 10                        |
| Ethoxyquin, antioxidant      | 0.02                      | 0.02                      |
| % by weight                  |                           |                           |
| Protein                      | 15.3                      | 14.9                      |
| CHO                          | 63.3                      | 63.8                      |
| Fat                          | 10                        | 10                        |

\*- Vitamin Mix, w/o choline, A, D, E; Vitamin E, DL-alpha tocopheryl acetate (500 IU/g; 0.242 g/kg); Vitamin A Palmitate (500,000 IU/g; 0.0396 g/kg); Vitamin D3, cholecalciferol (500,000 IU/g; 0.0044 g/kg).
