# Supplementary material for: Increased Response to Immune Checkpoint Inhibitors with Dietary Methionine Restriction in a Colorectal Cancer Model
Source: MDPI journal article supplement (doi:10.3390/cancers15184467), 2023-09-07
Supplement: s1 [file s1]

|       |              |                                 |
|-------|--------------|---------------------------------|
| Human |              | Forward                         |
|       | <i>RPLP0</i> | TGT CTG CTC CCA CAA TGA AAC     |
|       | <i>HLA-A</i> | CTC TTT GGA GCT GTG ATC ACT     |
|       | <i>CD274</i> | CTT TGA GTT TGT ATC TTG GAT GCC |
|       | <i>STING</i> | CTT GAC TGT ATT GTG ACA TGG C   |
| Mouse |              |                                 |
|       | <i>Rplp0</i> | CGC TTG TAC CCA TTG ATG ATG     |
|       | <i>H2Kb</i>  | GGT GAC TTT ATC TTC AGG TCT GCT |
|       | <i>Cd274</i> | CCA CAT TTC TCC ACA TCT AGC A   |

Reverse

TCG TCT TTA AAC CCT GCG TG  
GAA GGG CAG GAA CAA MTC TTG  
AGG ACT CAC TTG GTA ATT CTG G  
GCA TCA AGG ATC GGG TTT ACA G

TTA TAA CCC TGA AGT GCT CGA C  
GCT GGT GAA GCA GAG AGA CTC AG  
TCC ATC CTG TTG TTC CTC ATT G
